1 Title:

2 Proteome dynamics of COVID-19 severity learnt by a  
3 graph convolutional network of multi-scale topology

4 Running title:

5 Proteome dynamics of COVID-19 severity

6 Samy Gauthier<sup>1</sup>, Alexy Tran-Dinh<sup>2,3</sup> & Ian Morilla<sup>1,#</sup>

7 <sup>1</sup>*Université Sorbonne Paris Nord, LAGA, CNRS, UMR 7539, Laboratoire d'excellence Inflammex,*  
8 *F-93430, Villetaneuse, France.*

9 <sup>2</sup>*Université de Paris, AP-HP, Hôpital Bichat Claude Bernard, Département*  
10 *d'anesthésie-Réanimation, INSERM, Paris, France.*

11 <sup>3</sup>*Université de Paris, LVTS, Inserm U1148, F-75018 Paris, France.*

12 July 4, 2022

13 **Abstract**

14 Many efforts have been recently done to characterise the molecular mechanisms  
15 of COVID-19 disease. These efforts resulted in a full structural identification of  
16 ACE2 as principal receptor of the Sars-CoV-2 spike protein in the cell. However,  
17 there are still important open questions related to other proteins involved in the  
18 progression of the disease. To this end, we have modelled the plasma proteome of  
19 384 COVID patients. The model calibrated proteins measures at three time tags  
20 and make also use of the detailed clinical evaluation outcome of each patient after

---

#Contact: morilla@math.univ-paris13.fr

21 their hospital stay at day 28. Our analysis is able to discriminate severity of the  
22 disease by means of a metric based on available WHO scores of disease progression.  
23 Then, we identify by topological vectorisation those proteins shifting the most in  
24 their expression depending on that severity classification. Finally, the extracted  
25 topological invariants respect the protein expression at different times were used as  
26 base of a graph convolutional network. This model enabled the dynamical learning  
27 of the molecular interactions produced between the identified proteins.

28 **Keywords**— Sars-CoV-2, plasma proteome, severity progression, persistent homology, graph con-  
29 volutional network

## 30 Introduction

31 There exist proved evidences on how certain proteins such as ACE2 receptor or TMPRSS2 are  
32 used by severe acute respiratory syndrome coronavirus 2 (Sars-Cov-2) as entrance gates to infect  
33 the cell. Likewise, there are also multiple clues on a likely participation of other proteins in the  
34 downstream of the disease during its progression Delgado Blanco et al. 2020; Scudellari 2021;  
35 Yang, Petitjean, and Koehler 2020; Zamorano Cuervo and Grandvaux 2020. All these experi-  
36 mental efforts aim to characterise the progression of COVID from an in situ baseline analysis  
37 of proteomic profiles. Unfortunately, most of those analyses tend to overlooking non-linear pro-  
38 grammes of interaction determined by subsets of proteins already described in such studies. Some  
39 of those programmes are merely contributing to an innocuous reconfiguration of the secondary  
40 immune response system, but others can be causally provoking a worsening in the severity of the  
41 symptoms during the disease progression. In this work, we learn the later through graph convolu-  
42 tional networks calibrated with higher topological features extracted from raw soluble proteomic  
43 data. To this end, we computed persistent homology of more than 1,400 protein profiles in blood  
44 enhanced in endothelial cells across samples Xu et al. 2019. Our models achieved tracking pro-  
45 tein interactions occurring post-infection by which different levels of severity developed by 384  
46 individuals suffering from Covid19 symptoms might be explained Filbin, Goldberg, and Hacohen  
47 cited October 2021. In this sense, the Covid status of inpatients was tested positive prior to  
48 enrolment or during hospitalisation. Then, based on that test, we discriminated 306 patient as  
49 *Covid+* and 78 patients as *Covid-* (see Fig.1a). In addition, we wanted to improve our models'

50 interpretability by means of the detailed clinical outcomes available from each patient at day  
51 28 of their stay in the hospital. In total, those variables encompass up to 40 different types of  
52 multi-variates sequences (see *variable descriptions* file in SI). Those data allowed us to compute  
53 a precise overall-score of severity based on discrete World Health Organisation (WHO) Organi-  
54 sation cited November 2021 scores provided in the cohort for each patient over time of stay in  
55 the hospital. First, we vectorised those scores with the aim of being using entropy Gray 2013 to  
56 calculate the information encapsulated by the WHO scores in each patient. That information in  
57 bits Murphy 2012 enabled the construction of a probability density function that basically well  
58 stratified individuals according to severity progression of disease what ultimately reinforced the  
59 explanatory power of our learning models.

## 60 Results

### 61 Hierarchical models of WHO scale-based entropy information stratify patients 62 by severity

63 The scores of severity provided by WHO monitoring disease progression throughout the entire  
64 patient's stay at the hospital centre. Those values were recorded according to the discrete mea-  
65 sure  $W_s = \{1, 2, \dots, 6\} \in \mathbb{Z}^+$  at days 0, 3, 7, and 28 (see *variable descriptions* file in SI for their  
66 interpretation). This is a suitable *clinical* indicator, but pretty local screenshot of disease pro-  
67 gression in an individual (see Fig.1b). To avoid such an inconvenient, we intended to construct  
68 a way of containing local and global records along with some meaningful qualitative information.  
69 We considered, then, information theory scores by Shannon 2001. Thus, we vectorised patient's  
70 WHO scores obtaining a discrete random variable  $V$ , with possible outcomes  $v_1, \dots, v_6$ , which  
71 occur with probability  $P(v_1), \dots, P(v_6)$ . In order to extract the self-information of any given event  
72  $\hat{V} = \hat{v}$  in bits MacKay 2017, we computed the entropy of each individual per vector by apply-  
73 ing the formula  $H(\hat{V}) = -\sum_{i=1}^6 P(\hat{v}_i) \log_b P(\hat{v}_i)$  (see Fig.1c). Then, the bits information for a  
74 context channel  $p(\hat{v}|v')$  with  $\hat{v}$  and  $v'$  in the discrete alphabet  $W_s$  resulted in a continuous dis-  
75 tribution whose domain  $\mathcal{D} = [1, 2] \in \mathbb{R}^+$ . Hence, we fitted the transformed data (see Fig.S1a)  
76 to the best distribution by checking a comprehensive set of probability density functions (PDFs)

77 (see Fig.S1b). The generalised continuous normal random variable (see Fig.1d) yielded the best  
78 performance and was calculated as follows:

$$f : \mathcal{D} \times (0, 1) \rightarrow \mathbb{R}^+$$
$$f(x, \beta) = \frac{\beta}{2\Gamma(\frac{1}{\beta})} \exp(-\|x\|^\beta),$$

79 where  $\beta \in [0.01, 0.99]$  and  $\Gamma$  is the function gamma Sun 2020. By means of this function,  
80 we calibrated hierarchical clustering models that were computed applying the Hdbscan algorithm  
81 Campello, Moulavi, and Sander 2013. Hence, we achieved to discriminate the Covid cohort  
82 into three different groups (see files *mild/intermediate/acute\_severity-Covidp* files in SI). Those  
83 groups basically met the *mild*, *intermediate*, and *acute* symptoms as registered in the available  
84 clinical dataset (see Fig.1d). From this stratification, 13 out of 384 patients were excluded to  
85 be considered as outliers with noisy data. These patients displayed dissimilar symptoms and  
86 unmatched characteristics amongst them to be included in any of the groups (see file *ids0\_noisy\_*  
87 *severity\_cluster-Covidp* in SI and Fig.S2).

## 88 **The latent space of clinical features explains patients' stratification**

89 We unified many local perspectives of the clinical dataset to explain models of severity progres-  
90 sion (see Fig.S4a-d). To this end, we summarised both an entire model and individual features  
91 learnt from the pdf of our Shannon's Entropy severity. This task was eventually performed using  
92 the medical outcome dataset (see *MGH\_COVID\_Clinical\_Info* file in SI) to train a three dense  
93 layers convolutional neural network with 269,313 trainable parameters (see Fig.S3). The archi-  
94 tecture of this network consisted of two convolution 2D and a last flatten layer with a scheme  
95 of  $(384, 40, 512) \times 2$  and  $(384 * (40//512) * 1)$  as output dimension. Next, we computed local  
96 explanations based on Shapley-related extensions, i.e., the so-called SHAP values Lundberg and  
97 Lee 2017. To figure out the relative contribution of each feature to our model output individually,  
98 we plotted the values of every local feature for every sample in the cohort. The Fig.2d -right hand  
99 panel- show a plot of sorted features by the sum of local value magnitudes over all samples, and  
100 uses such values to show the distribution of the impacts each feature has on the model output.

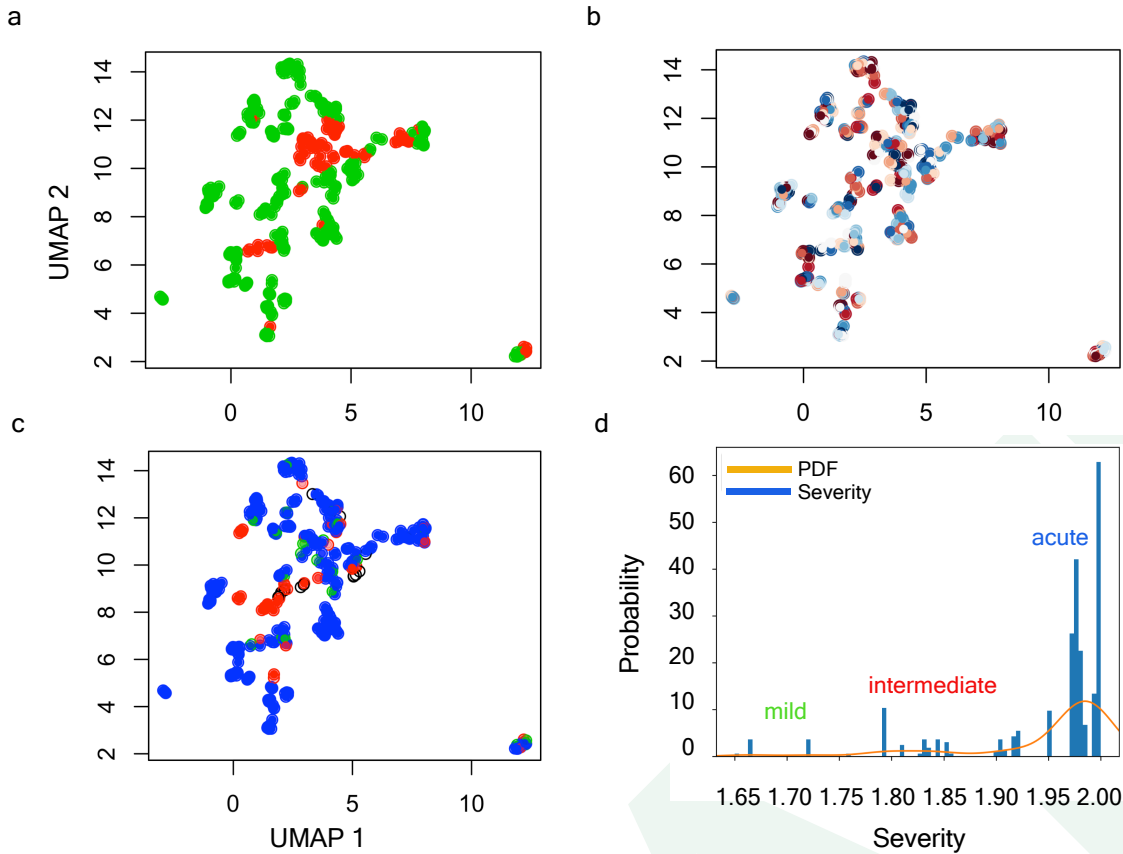

**Figure 1.** HdbSCAN Severity clustering by means of Entropy measures. (a-c) UMAP projection of clinical data. (a) Stratification by *Covid+* and *Covid-*. (b) Inpatients' stratification by  $WHO_{max}$  score (i.e., a measurement correlated with the maximum WHO outcomes achieved by patients during their hospital stay and also available in the clinical dataset). (c) Individual discrimination by Shannon's Entropy combined with *HdbSCAN* clustering algorithm. The blank circles show inpatients considered as outliers by the dissimilarity of their symptoms. (d) Probability density function optimally fitted in accordance with Shannon's Entropy displaying three sharp peaks, namely: mild, intermediate, and acute associated with inpatients of the *Covid* cohort.

101 The colour represents the feature value (red high, blue low). This reveals for example, a known  
102 fact, that a high *categorical age* (% lower status of the population) raises the predicted risk of  
103 experiencing acute severity in Covid disease. In the left-hand panel of Fig.2d, we observe this  
104 same effect in stacked red bars for our multi-class output task.

105 To understand how a single feature effects the output of the model we plotted the local value  
106 of that feature vs. the value of the feature for all the inpatients in the clinical dataset (see  
107 Fig.2a). Now, we can zoom in some of those effects individually as shown in Fig.2b for lung, and  
108 respiratory (the one quantified as lowest in its contribution to severity learning) symptoms. Since  
109 locally explained values represent a feature's responsibility for a change in the model output, the  
110 plot in Fig.2c represents the change in predicted Covid severity as *Age cat* (the average age per  
111 category in the cohort), or pre-existing hypertension change. Vertical dispersion at a single value  
112 of *Age cat* represents interaction effects with other features. To help reveal these interactions we  
113 can colour by another feature. If we pass the whole explanation tensor to the colour argument the  
114 scatter plot will pick the best feature to colour by. In this case it picks *Fever\_Sympt* (symptoms  
115 associated with fever) since that highlights that the the average age per category in the cohort  
116 has less impact on acute Covid severity for categories with a high *Fever\_Sympt* value.

117 The values of interaction between locally explained variables are a generalisation of those  
118 to higher order interactions. Fast exact computation of pairwise interactions are implemented  
119 for tree models with. This returns a matrix for every prediction, where the main effects are  
120 on the diagonal and the interaction effects are off-diagonal. These values often reveal interesting  
121 hidden relationships, such as how the increased risk of death peaks for inpatients with mild febrile  
122 symptoms at the age between 20 and 34 (see Fig.2c -upper panel-). Or that non-pre-existing  
123 hypertension has less impact on individuals with a high *BMI\_cat* value (see Fig.2c -lower panel-).

## 124 **Persistent homology identifies novel key proteomic features involved in severity**

125 Based on the previous clinical characterisation of Covid severity, we exploited the proteomic  
126 plasma information available for the remaining 371 individuals in the cohort. Unfortunately,  
127 the particular geometry of inpatient's proteomes as embedded onto lower dimensional spaces  
128 resulted highly sensitive to parameter setups considered in downstream analyses according to

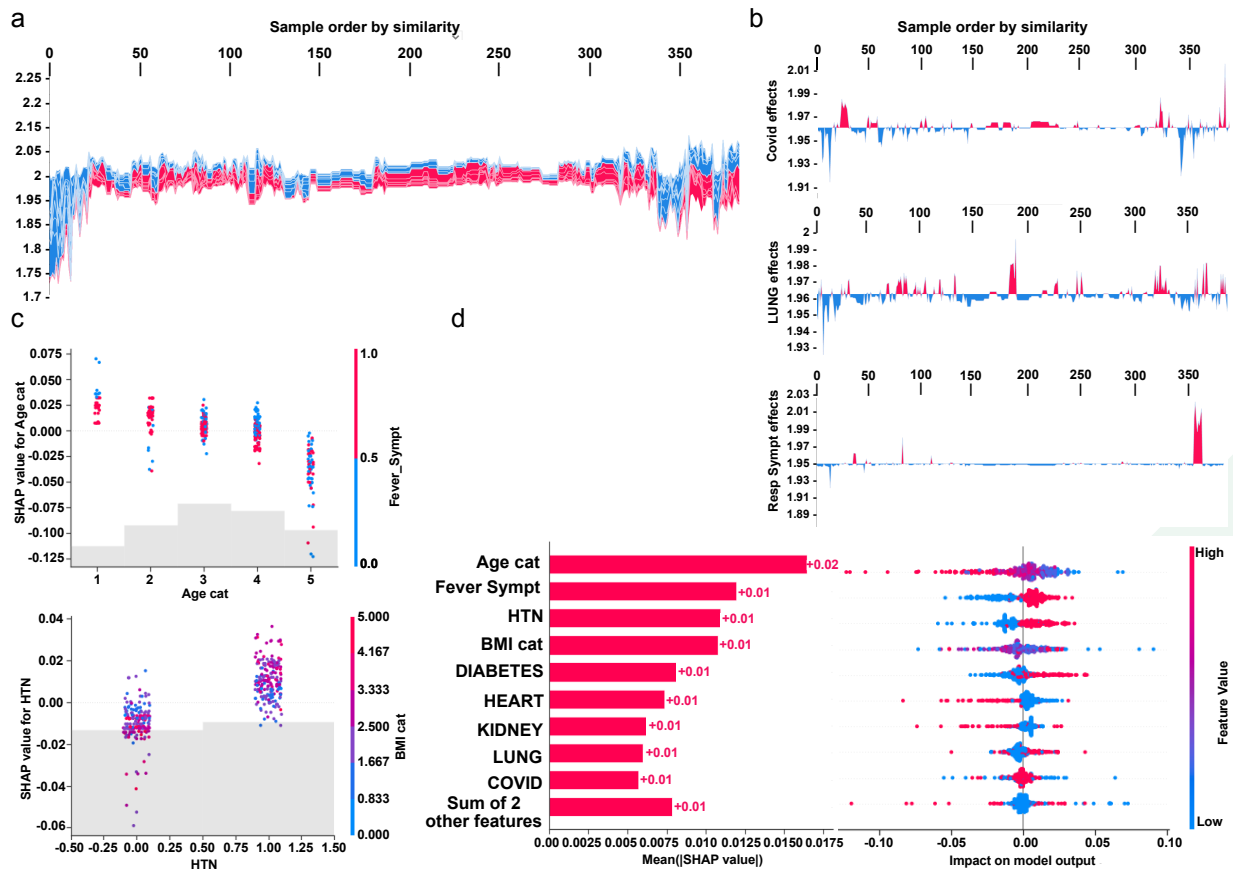

**Figure 2.** Clinical evaluation of our entropy-based model on Covid severity score by model and higher individual features. Initial explanations are based on a gradient boosted decision tree model trained on the covid cohort. (a) Globally stacked *SHAP* explanations clustered by explanation similarity. Inpatient profiles land on the *x*-axis. Red values increase the model prediction, blue ones decrease it. Two clusters stands out: On the left is a group with low predicted risk of suffering an acute covid, whereas on the right we have a group with a high predicted risk of suffering from acute covid. (b) Top-bottom: locally stacked explanations clustered by explanation similarity for infection, lung, and respiratory symptoms. (c) Effect of a single feature across the whole cohort. Top-bottom: dependence plots for *Age* and *Hypertension*(*HTN*) features. These plots display inflection points in predicted age and hypertension as *Agecat* and *HTN* (oldness by years on average and hypertension complaint per individual in the cohort) changes. Vertical dispersion at a single category of *Age* (resp. *HTN*) represents interaction effects with other features. To help reveal these interactions, we coloured by *Fever* (resp. *BMI*). We passed the whole explanation tensor to the colour argument in the dependence plots to pick the best feature to colour by. In this case, it selected *Fever* symptoms (resp. *Body Mass Index*) since that highlights that the average age (hypertension) per inpatient has more (less) impact on covid severity for categories with a low (high) *Fever* (*BMI*) value. (d) Left: bar chart of the average *SHAP* value magnitude. *Age* was the most important symptom, changing the predicted absolute covid probability on average by 2 percentage points (0.02 on *x*-axis). Right: a set of beeswarm plots, where each dot corresponds to an inpatient in the cohort per significant symptom. The dot's position on the *x* axis shows the impact that a symptom has on the model's prediction for a given inpatient. The piled up dots mean density of inpatients suffering from a symptom with similar impact on the model. Younger ages reduce the predicted covid risk, elder ages increase the risk.

129 entropy-based severity. In such scenario, we computed topological invariant structures instead (see  
130 *rips\_complex\_patient\_29\_severe* video in SI). These invariants, the so-called simplicial complex,  
131 qualitatively analyse features that persist across multiple scales. Such invariants can be classified  
132 over days 0, 3, and 7 by obtaining their generators through persistent homology (see Fig. S5a).  
133 This analysis led us to identify unique protein configurations (see Figs.S5b and S6) within inpatient  
134 proteomes based on their connected components Aktas, Akbas, and Fatmaoui 2019; Xia and Wei  
135 2014. Thus, the whole universe of proteome embeddings could be enclosed in the quotient space  
136  $\mathcal{P}/\sim$  under the given equivalent relation: for any  $p_i \in \mathcal{P}$ ,  $p_i \sim p_j$  if the projected proteome  $i$  “is  
137 similar to” on the set of all rotated tails, the so-called special orthogonal group  $SO(3)$  Hall 2004.  
138 Hence, a partition with two classes of equivalence come out whose disjoint union determines the  
139 all three revealed groups of patients (see *rips\_complex\_patient\_29\_and\_42\_severe* video in SI).  
140 Indeed, these classes of equivalence have as represents  $[c_b] := \{x \in \mathcal{P} : x \sim c_b\}$  iff  $b$  is a ball-like  
141 shape in  $SO(3)$  and  $[c_s] := \{x \in \mathcal{P} : x \sim c_s\}$  iff  $s$  is a start-like shape in  $SO(3)$ . These two classes  
142 can be visualise in upper and lower panels of Fig.3a-b. Now, to identify proteins whose profiles are  
143 invariants of each inpatient over the days of their stay  $\{0, 3, 7\}$ , we primary analysed the classes  
144 of equivalence  $[c_b]$  and  $[c_s]$  of each partition by persistent homology per group. Specifically,  
145 we used persistence diagrams wherein we quantified the number of homology generators (see  
146 upper Fig.3c) while testing their quality by means of confidence band generated by probabilistic  
147 boosting and density diffusion (see lower panel of Fig.3c). This enabled the identification of  
148 unique set of proteins (see files *-M1s\_mild / M2s\_intermediate/ M3s\_acute-severity-Covidp* in SI)  
149 that encapsulated two and three dimensional structures (Figs.3d-e) important to topologically  
150 characterise severity classification per group over the days of stay of each individual in the hospital.  
151 Thus, we mapped the transmembrane serine proteases TMPRSS5 and SS15 Huttlin et al. 2017 as  
152 novel receptors taking part of the infection machinery. These proteins belong to the same family  
153 of TMPRSS2, a known receptor used by Sars-CoV-2 to enter the cell Hoffmann et al. 2020. Both  
154 of those proteins were located amongst the dysregulated interactome of inpatients stratified as  
155 acute and strikingly also as mild. Furthermore, amid the proteins we found (see *M#s* files in SI for  
156 the entire list), there were proteins in acute -BRK1, LAP3, SLC27A4, SLC39A14-, intermediate  
157 -SLC27A4-, and mild -BRK1, SLC27A4, and SLC39A14- inpatients functionally linked Huan,



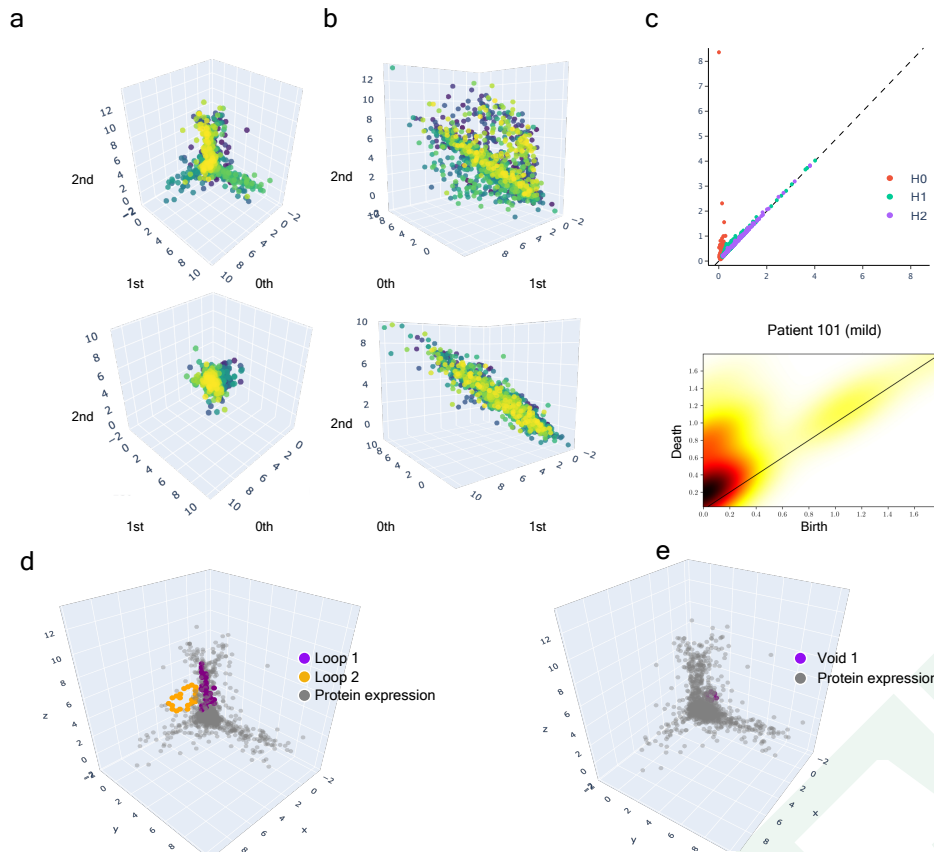

**Figure 3.** Multi-scale topology analysis flowchart. (a) -Upper- class of equivalence  $[c_b]$  determined by umap projection of mild inpatients upon rotation on  $SO(3)$ . -Lower- umap projection of an inpatient's soluble proteome. (b) -Upper- class of equivalence  $[c_t]$ , taking as example to show the mild inpatient 101. -Lower- umap projection of that inpatient's soluble proteome. (c) -Upper- topological feature extraction from diagram of persistence of patient 101 and its later calibration. -Lower- Application of density diffusion for separating noise from robust signals in persistence diagram of inpatient 101. (d) Spotted loops of proteins enclosing dimension 2 structures important to explain severity stratification over time of patient 101. (e) Spotted voids of proteins enclosing dimension 3 structures important to explain severity stratification over time of patient 101.

158 Sherman, and Lempicki 2009a,b with AP3B1, BRD4, BRD2, CWC27, SLC44A2, and ZC3H18  
 159 whose profiles are reported to be likely involved in early infection caused by the virus Gordon  
 160 et al. 2020. Finally, the functional analysis of the novel proteomic features resulted from our  
 161 persistence analysis showed along with their ancestors two sharp clusters bound to pneumonia  
 162 and inflammation pathways (see Fig.S7).

163 **Dynamic tracking of protein interactions required by the virus to efficiently**  
164 **infect the cell**

165 Once we put the spotlight on individual proteins topologically important to discriminate Covid  
166 patients over time, we envisaged to capture their dynamics of functional interactions at regulatory  
167 levels. To this end, integrated protein-protein interaction networks were firstly constructed per  
168 group of patients using co-localization, co-expression, physical interactions, and shared domains  
169 Warde-Farley et al. 2010. Then, we enquired these graphs about their connections quality by  
170 means of degree and centrality distributions as shown in Fig.4. Surprisingly, we could confirm  
171 (see Fig.4) that neither was highly connected nor played an important modular role in the graphs.  
172 Next, we monitored the behavioural regulation of the nodes' graph aggregation on semi-supervised  
173 learning on a community composed by known and unknown protein interaction with ACE2 and  
174 TMPRSS2 Morilla et al. 2022 (see the movies in format .avi provided in SI, namely: *mild /*  
175 *intermediate / acute\_fcD (resp. outlier)\_severity\_covidp\_candidates\_anim.*). To compute such a  
176 tracking, we endowed the graphs with a tailored hybrid design covered in convolutional layers along  
177 with a spectral rule Defferrard, Bresson, and Vandergheynst 2017 as occurs in graph convolutional  
178 networks (GCNs). The first model's performance yielded an accuracy, for each group of inpatients,  
179 of 0.49, 0.41, and 0.85 supported by 76, 146, and 355 samples regarding *covid* and *non - covid*  
180 feature representations, respectively. Those values raised to 0.71, 0.84, and 0.95 to the second  
181 learning model. We also found their corresponding performances asymptotically tended to 0.65,  
182 0.7, and 0.81 when layers were largely increased from the 32 units in the convolutional architecture.

183 In that way, we learnt how ACE2 and TMPRSS2 interacted with the persistent novel candi-  
184 dates to explain the virus machinery at its entrance into the cell to put patients into mild, inter-  
185 mediate or acute groups of severity over time (see mp4 video files *covidp\_mild / intermediate /*  
186 *acute\_feature\_#\_weighted* in SI). Hence, a primary set of proteins that led to acute severity con-  
187 sisted of the progressive aggregation of BCAN, CA2, CA12, CLEC4, FOLR1, FOLR2, IFNGR2,  
188 IGSF3 (R), ILR13A1(R), LAIR1, LRRN1, PCDH17, RTBDN, SEZ6L, SIGLEC6 Schulte-Schrepping  
189 et al. 2020, and TNFRSF21 with respect to *covid* feature representation. Especially, CLEC4 be-  
190 longs to a protein family (i.e., the C-type lectin receptor) involved in regulating immune reactivity  
191 through platelet degranulation whose expression showed significantly decreased in COVID-19 and

192 correlated with disease severity Overmyer et al. 2021. The interactions occurring early on during  
193 the infection amongst AXL, CD58, DDR1, DLK1, FCGR3A, TNFRSF12A, UXS1, and XPNPEP2  
194 set the *non-covid* latent feature. Herein, we spotted CD58 a nonclassical monocyte such as CD274  
195 (PD-L1) known inhibitor of T cell activation along with Arginase 1 (ARG1) Bronte et al. 2003; Li  
196 et al. 2018 highly expressed in neutrophils in COVID-19 patients or CD24 involved in neutrophil  
197 degranulation with an increased expression of neutrophil function Overmyer et al. 2021. Therein,  
198 we also identified FCGR3A (encoding CD16a) that is regulating severity-dependent alterations of  
199 the myeloid cell compartment during Sars-CoV-2 infection. Indeed, FCGR3A has been already  
200 found to be a non-classical monocytes marker in COVID-19 Schulte-Schrepping et al. 2020. Next,  
201 to the *covid* representations that determined intermediate severity of patients, we found the early  
202 aggregations of FR2, GALS4, IL1RN(R), ILR1(R), LRPAP1, RNF41, TRIM21(R), and VWV2.  
203 Remarkably, RNF41 plays a central role during interactions of Sars-CoV-2 with innate immune  
204 pathways since its interferon pathway is targeted by RNF41 (NSP15) Gordon et al. 2020. Then,  
205 the intermediate *non-covid* representations are governed by the interactions of CCR5 (intestinal  
206 pro-inflammatory), CPA1, LAMA2, PLA2G4A, PON3, SETMAR, TGFB1, and XCL1. Finally,  
207 aggregations of C4BPB, CD70(R), IPCEF1, MAVS(R), PLCG2, and THBS2(R), led to mild  
208 severity stratification to *covid* feature representations. At the same time, the interactions be-  
209 tween CD200, MAPKAPK5 Kindrachuk and al 2015, NTRK3(R), PRAP1(R), XPNPEP2(R) set  
210 the *non-covid* feature representations. In these two list, we might mention a similar effect on  
211 neutrophils and expression as CD58 to CD70 and CD200 Overmyer et al. 2021.

212 We checked that *covid* feature representation of patients with acute symptoms was function-  
213 ally characterised by a set of proteins involved in the fusion of virus enclosure to the host endosome  
214 membrane (GO:0039654) at the virus entrance into the cell. Overall, the interactions between  
215 ACE2 and TMPRSS2 and these persistent proteins were largely enriched in the immunoglobulin-  
216 like fold functional category. From a mere clinical stratification point of view, these conditions  
217 characterise most of the inpatients in the available clinical dataset suffering of cardiovascular com-  
218 plications. *Non-covid* representation of acute patients was strongly composed by membrane and  
219 signal peptide functional categories, protein tyrosine kinase and glycoprotein with extracellular  
220 and cytoplasmatic topological domains and transmembrane helix and integral component in the

221 region biological processes. In this case, these conditions felt on patients mainly suffering from  
222 diabetes of type 1 and immunosuppression.

223 Regarding the *covid* feature representation of intermediate patients, an overabundance of pro-  
224 tein binding function is observed with diabetes of type 2 and normal variation diseases associated  
225 with such condition. On the other side, the *non – covid* feature of this group is strongly en-  
226 riched with disulfide bond and signal peptide functional categories. Therein, we found various  
227 terms directly linked with endosome viruses' machinery. Thus, we identified clathrin-dependent  
228 endocytosis (GO:0075512), host lysis, inhibition of host IKBKE, JAK1, RLR pathway, TBK1,  
229 and TLR pathway triggered by virus in the host cell. Those symptoms were identified to a wide  
230 range of the complications described in the clinical dataset. In particular, asthma severity, chronic  
231 hepatitis C, immunosuppression after liver transplantation, diabetes specially strong of type 2,  
232 heart and kidney complications, and hypertension.

233 Finally, the latent *covid* representation of mild patients' proteomes were functionally charac-  
234 terised by a weak overabundance of disulfide bond and glycosylation site (i.e., N-linked as GlcNAc,  
235 etc.). These categories were related with supression by virus of host adaptative immune response  
236 (GO:0039504). Remarkably, there were no disease-associated genes type-specific to these biolog-  
237 ical processes. The *non – covid* mild features were actually overrepresented by signal peptide,  
238 qualitatively similar to those features described to the intermediate *non – covid* patients. We will  
239 fully expose and discuss the intriguing implications of such results in the next section.

## 240 Discussion

241 Sars-CoV-2 has become these two last years a real life-thread that has collapsed the health systems  
242 worldwide. Many efforts have been already done to structurally characterise the Sars-CoV-2  
243 spike protein. To predict its severity, large mappings of proteins likely involved in the machinery  
244 applied by the virus to infect the cell have been reported. All these investigations have led to  
245 enormous advancements in COVID-19 treatment that consequently have given rise to efficient  
246 vaccines. However, there is still some facets not well-characterised or yet sufficiently explored.  
247 In our attempt to contribute to this research, we computed an overall severity score based on  
248 WHO scales instrumental to provide a chart explaining the protein interactions required by the

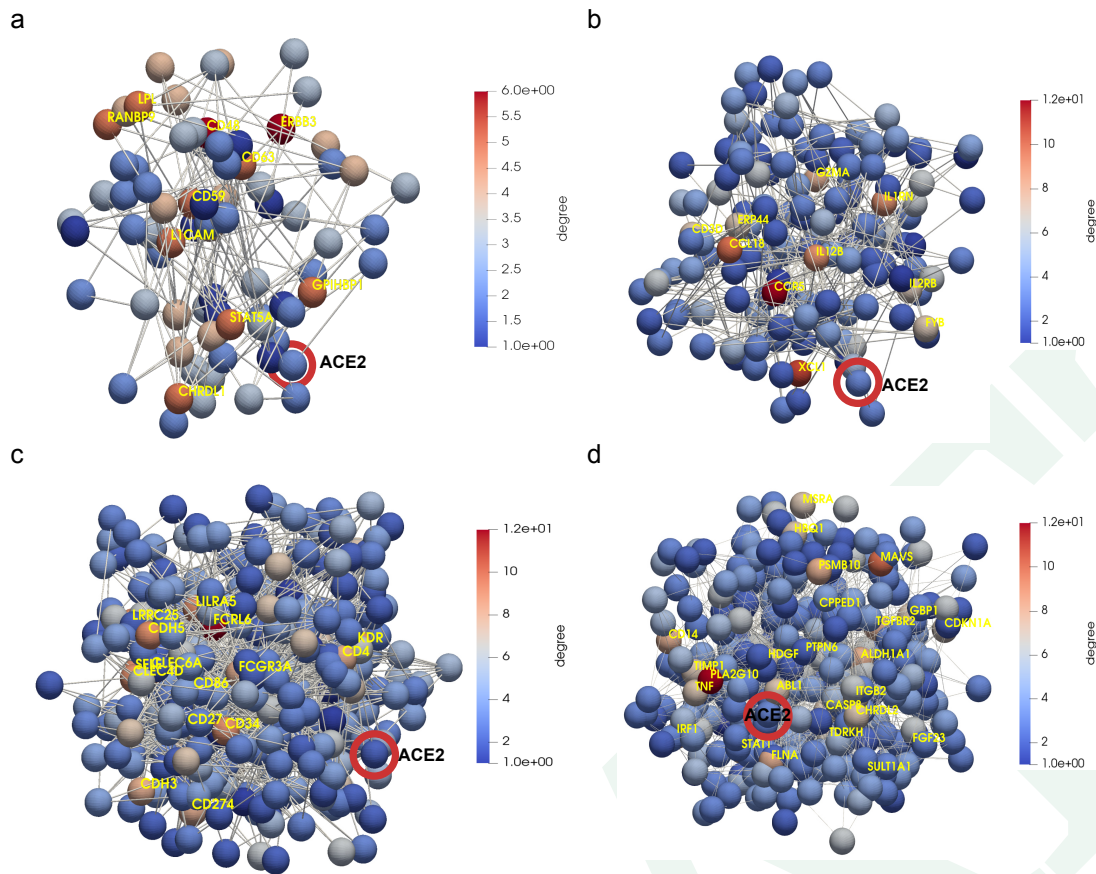

**Figure 4.** Regulatory gene networks regarding ACE2 and TMPRSS2. (a) mild patients. (b) intermediate patients. (c) acute patients. (d) group of proteins non-functionally enriched in acute patients. Highlighted in red ACE2 as one initial seem in the downstream analysis of protein interactions occurred post-infection. Yellow enhances those proteins (ERBB3, CD48, CCR5, FCRL6, PLA2G10, amongst others) with a higher connectivity degree in the networks.

249 virus to stratify a patient's infection into mild, intermediate, or acute. To this end, we made use  
250 of a double analysis linking symptoms to protein expressions and interactions with ACE2 and  
251 TMPRSS2. Merely from a stratification standpoint, we give novel information as well as verified  
252 known facts about Covid. As conclusion, we could claim that in itself COVID-19 is not as harmful  
253 as it is in association with other risk factors such as age, febrile symptoms, or overweight. Indeed,  
254 most of the *Covid-* patients, though some were considered as outliers as indicated in the earlier  
255 sections, but most held a relative high entropy value of severity due to an eventual intubation,  
256 ventilation or supplementary oxygen requirement. To achieve those high peaks *Covid+* should  
257 be elderly people with overweight and present fever and/or respiratory symptoms.

258 More importantly, we obtained functional evidences of how particular sequences of proteins  
259 interacted with the virus to block the immune systems during the infection. Thus, we could  
260 explain the infection fate towards the acute symptoms since an endosome aciditication is produced  
261 during the infection initiating conformational proteins fusion. In that way, Sars-CoV-2 could take  
262 advantage of such pathway to be endocytosed as happens with many types of viruses such as  
263 influenza A virus, alphaviruses or HIV-1.

264 Regarding patients suffering from intermediate symptoms that endocytic process is caused  
265 over proteins that contain at least one coiled domain forming stiff bundles of fibres. Hence,  
266 proteins are modified by signalling upon creation of interchain disulfide bonds, which can produce  
267 stable, covalently linked protein complexes likely contributing to fold and stabilise proteins. In  
268 virus internalization, clathrin-mediated endocytosis could be then generated in response getting  
269 assembled on the inside face of the cell membrane to cleave the host cell (CCV) by the action of  
270 DNM1/Dynamin-1 or DNM2/Dynamin-2. Then, the virus may be delivering their content to early  
271 endosomes via CCV. These mechanisms could be expressing in Sars-CoV-2 using different ways as  
272 by lysing the host cell, blocking the host innate defenses via IKBKE/IKK-epsilon kinase inhibition,  
273 JAK1 protein, DDX58/RIG-I-like repector (RLR) what stabilises the antiviral state, TBK1 kinase  
274 inhibition to prevent IRFs activation, or toll-like recognition receptor (TLR) pathway evasion,  
275 which makes the production of interferons to be inhibited and so to establish a stable antiviral  
276 state.

277 To mild cases, the Sars-CoV-2 protein could be preventing the tuned repertoire of self and

278 nonself antigens' recognition of efficiently acting against the malicious effects of cell infection. In  
279 these cases, Sars-CoV-2 would be escaping the adaptive immune response by simply interference  
280 with the presentation of antigenic peptides at the surface of infected cells.

281 Overall, results provided in this work, contribute to gaining new insights into non-linear rela-  
282 tionship between "message passing" proteins, particularly explaining disease severity modulation  
283 during the Sars-CoV-2 infection.

## 284 Methods

### 285 Samples

286 Data provided by the MGH Emergency Department COVID-19 with Olink proteomic. Clinical dataset and  
287 plasma proteomes of 384 patients distributed in 306 patient that tested positive in COVID-19 that were  
288 named as *Covid+* and 78 patients tagged as *Covid-* that tested negative even suffering from respiratory  
289 symptoms.

### 290 Notes on the graph convolutional network

We endowed the regulatory persistent-based protein networks (RPPNs) with a convolutional design (i.e. neural networks) along with a spectral rule of node aggregation as in GCN Defferrard, Bresson, and Vandergheynst 2017. The sequential combination of two hybrid models enabled the learning of interactions between ACE2 and TMPRSS2, and the persistent proteins needed by the virus to be spread in cells. Following this reasoning, we primary made use of the identity matrix  $I$  as features and the adjacency matrix  $A$  contributing the model in the following spectral rule:

$$S_r(A, I)_i = \sum_{l=1}^N \frac{1}{D_{k,k}^{1/2}} A_{k,l} \frac{1}{D_{l,l}^{1/2}} I_l$$

291 where  $D$  is the degree matrix. Right after, we considered the metric given by distance of the shortest path  
292 to characterise the early aggregation of persistent proteins to ACE2 and TMPRSS2 as an additional feature  
293 in a second model. Thus, we generated models with two layers computed by 32 units per layer and a 2D  
294 transformation of the activation function tanh. When applying the spectral rule the relu activation function  
295 is applied at the beginning of the layer implementation instead of later on. The number of epochs was set  
296 to 250 and 5000, respectively. We computed the stochastic gradient descent (sgd) optimizer in the training

297 task picking a learning rate and momentum regularization set to 0.001 and flagged true, respectively. The  
298 semisupervised classification (*covid* or *non – covid* early proteins aggregation) of nodes in the RPPNs Kipf  
299 and Welling 2017 was performed by an in-house python script based on MXNet implementation *Faster,*  
300 *Cheaper, Leaner: improving real-time ML inference using Apache MXNet* 2021.

## 301 Data access

302 All data used in this work are included in the article and/or SI Appendix.

## 303 Acknowledgments

304 We would like to thanks the funding from National Research Association (ANR) (Inflamex renewal  
305 10-LABX-0017 to I.M.), DHU FIRE Emergence 4, and the l'Agence de la Biomédecine.

## 306 References

- 307 Aktas, M.E., E. Akbas, and A.E. Fatmaoui (2019). “Persistence homology of networks: methods  
308 and applications.” In: *Appl. Netw. Sci.* 4.1, 61:1–61:28.
- 309 Bronte, V. et al. (2003). “Larginine metabolism in myeloid cells controls T-lymphocyte functions.”  
310 In: *Trends Immunol* 24.1, 302–306.
- 311 Campello, R. J. G. B., D. Moulavi, and J. Sander (2013). “Density-Based Clustering Based on  
312 Hierarchical Density Estimates”. In: *Advances in Knowledge Discovery and Data Mining*. Ed.  
313 by Jian Pei et al. Berlin, Heidelberg: Springer Berlin Heidelberg, pp. 160–172. ISBN: 978-3-  
314 642-37456-2.
- 315 Defferrard, M., X. Bresson, and P. Vandergheynst (2017). *Convolutional Neural Networks on*  
316 *Graphs with Fast Localized Spectral Filtering*.
- 317 Delgado Blanco, J. et al. (2020). “In silico mutagenesis of human ACE2 with S protein and transla-  
318 tional efficiency explain SARS-CoV-2 infectivity in different species”. In: *PLOS Computational*  
319 *Biology* 16.12, pp. 1–16. DOI: 10.1371/journal.pcbi.1008450.



- 320 *Faster, Cheaper, Leaner: improving real-time ML inference using Apache MXNet* (2021). [https://](https://medium.com/apache-mxnet/faster-cheaper-leaner-improving-real-time-ml-inference-using-apache-mxnet-2ee245668b55)  
321 [medium.com/apache-mxnet/faster-cheaper-leaner-improving-real-time-ml-](https://medium.com/apache-mxnet/faster-cheaper-leaner-improving-real-time-ml-inference-using-apache-mxnet-2ee245668b55)  
322 [inference-using-apache-mxnet-2ee245668b55](https://medium.com/apache-mxnet/faster-cheaper-leaner-improving-real-time-ml-inference-using-apache-mxnet-2ee245668b55).
- 323 Filbin, Goldberg, and Hacoheh (cited October 2021). *Data provided by the MGH Emergency*  
324 *Department COVID-19 with Olink Proteomic*. <https://www.olink.com/>.
- 325 Gordon, D.E. et al. (2020). “A SARS-CoV-2 protein interaction map reveals targets for drug  
326 repurposing”. In: *Nature* 583.9, pp. 459–468.
- 327 Gray, R.M. (2013). *Entropy and Information Theory*. Springer-Verlag.
- 328 Hall, B.C. (2004). *Lie Groups, Lie Algebras, and Representations*. Springer US.
- 329 Hoffmann, M. et al. (2020). “SARS-CoV-2 Cell Entry Depends on ACE2 and TMPRSS2 and Is  
330 Blocked by a Clinically Proven Protease Inhibitor”. In: *Cell* 181.2, 271–280.e8. ISSN: 0092-8674.  
331 DOI: <https://doi.org/10.1016/j.cell.2020.02.052>.
- 332 Huan, D.W., B. Sherman, and R.A. Lempicki (2009a). “Bioinformatics enrichment tools: paths  
333 toward the comprehensive functional analysis of large gene lists”. In: *Nucleic Acids Res* 37.1,  
334 pp. 1–13.
- 335 — (2009b). “Systematic and integrative analysis of large gene lists using DAVID bioinformatics  
336 resources”. In: *Nat Protoc* 4.1, pp. 44–57.
- 337 Huttlin, E. et al. (2017). “Architecture of the human interactome defines protein communities  
338 and disease networks”. In: *Journal of Applied Mathematics and Physics* 2.545, pp. 505–509.
- 339 Kindrachuk, J. and et al (2015). “Antiviral potential of ERK/MAPK and PI3K/AKT/mTOR  
340 signaling modulation for Middle East respiratory syndrome coronavirus infection as identified  
341 by temporal kinome analysis”. In: *Antimicrob. Agents Chemother.* 59.2, 1088–1099.
- 342 Kipf, T.N. and M. Welling (2017). *Semi-Supervised Classification with Graph Convolutional Net-*  
343 *works*.
- 344 Li, X.-K. et al. (2018). “Arginine deficiency is involved in thrombocytopenia and immunosuppres-  
345 sion in severe fever with thrombocytopenia syndrome”. In: *Science Translational Medicine*  
346 10.459, eaat4162. DOI: 10.1126/scitranslmed.aat4162.

- 347 Lundberg, S.M. and S-I. Lee (2017). “A Unified Approach to Interpreting Model Predictions”.
- 348 In: *Advances in Neural Information Processing Systems 30*. Ed. by I. Guyon et al. Curran
- 349 Associates, Inc., pp. 4765–4774.
- 350 MacKay, D. J. C. (2017). *Information theory, inference, and learning algorithms*. Cambridge
- 351 University Press. ISBN: 9780521642989.
- 352 Morilla, I. et al. (2022). “Deep models of integrated multiscale molecular data decipher the en-
- 353 dothelial cell response to ionizing radiation”. In: *iScience* 25.1, p. 103685. ISSN: 2589-0042.
- 354 DOI: <https://doi.org/10.1016/j.isci.2021.103685>.
- 355 Murphy, K.P. (2012). *Machine Learning: A Probabilistic Perspective (Adaptive Computation and*
- 356 *Machine Learning series)*. The MIT press.
- 357 Organisation, World Health (cited November 2021). *WHO COVID-19 outcomes scale*. [https :](https://www.who.int/emergencies/diseases/novel-coronavirus-2019)
- 358 [//www.who.int/emergencies/diseases/novel-coronavirus-2019](https://www.who.int/emergencies/diseases/novel-coronavirus-2019).
- 359 Overmyer, K.A. et al. (2021). “Large-Scale Multi-omic Analysis of COVID-19 Severity”. In: *Cell*
- 360 *Systems* 12.3, 23–40.
- 361 Schulte-Schrepping, J. et al. (2020). “Severe COVID-19 Is Marked by a Dysregulated Myeloid
- 362 Cell Compartment”. In: *Cell* 182.1, 1419–1440.
- 363 Scudellari, M. (2021). “How the coronavirus infects cells - and why Delta is so dangerous”. In:
- 364 *Nature* 595.7869. PMID:34321669, pp. 640–644. DOI: 10.1038/d41586-021-02039-y.
- 365 Shannon, C.E. (2001). “A mathematical theory of communication.” In: *ACM SIGMOBILE Mob.*
- 366 *Comput. Commun. Rev.* 5.1, pp. 3–55.
- 367 Sun, Yeong-Jeu (2020). “A Note on the Generalized Gamma Function”. English. In: *International*
- 368 *Journal of Trend in Scientific Research and Development* 5.1, pp. 1502–1504. ISSN: 2456-6470.
- 369 Warde-Farley, D. et al. (2010). “The GeneMANIA prediction server: biological network integration
- 370 for gene prioritization and predicting gene function”. In: *Nucleic Acids Res.* 38, pp. 214–220.
- 371 Xia, K. and G-W. Wei (2014). “Persistent homology analysis of protein structure, flexibility, and
- 372 folding”. In: *International Journal for Numerical Methods in Biomedical Engineering* 30.8,
- 373 pp. 814–844. ISSN: 2040-7947. DOI: 10.1002/cnm.2655.

- 374 Xu, X. et al. (2019). “Finding cosmic voids and filament loops using topological data analysis”.
- 375 In: *Astronomy and Computing* 27, pp. 34–52. ISSN: 2213-1337. DOI: [https://doi.org/10.](https://doi.org/10.1016/j.ascom.2019.02.003)
- 376 [1016/j.ascom.2019.02.003](https://doi.org/10.1016/j.ascom.2019.02.003).
- 377 Yang, J., S.J.L. Petitjean, and M. Koehler (2020). “Molecular interaction and inhibition of SARS-
- 378 CoV-2 binding to the ACE2 receptor”. In: *Nat Commun* 11.4541. DOI: [10.1038/s41467-020-](https://doi.org/10.1038/s41467-020-18319-6)
- 379 [18319-6](https://doi.org/10.1038/s41467-020-18319-6).
- 380 Zamorano Cuervo, N. and N. Grandvaux (2020). “ACE2: Evidence of role as entry receptor for
- 381 SARS-CoV-2 and implications in comorbidities”. In: *eLife* 9. Ed. by Frank L van de Veerdonk
- 382 and Jos WM van der Meer, e61390. ISSN: 2050-084X. DOI: [10.7554/eLife.61390](https://doi.org/10.7554/eLife.61390).
